# Supplementary material for: Association between lung function impairment with urinary heavy metals in a community in Klang Valley, Malaysia
Source: PeerJ. 2022 Aug 9;10:e13845. doi: 10.7717/peerj.13845 (PMC9373978; doi:10.7717/peerj.13845)
Supplement: Supplemental Information 1 [file peerj-10-13845-s001.xlsx]

## Sheet: Sheet1
serial	age	gender	ethnic	employment status	education level	duration lived in Klang Valley (year)	average household income (RM)	current smoker	smoking duration (years)	average cigarette smoked per day	3 month average PM10 (mcg/m3)	3 month average PM2.5 (mcg/m3)	weight (kg)	height (m)	body mass index	hobby/job in painting	hobby/job in gardening	Urinary Cd (mcg/dL)	Urinary Pb (mcg/dL)	FVC (L)	FEV1 (L)	FEV1/FVC (%)	FVC%	FEV1%	FEF25-75 (L)	PEF (L/min)
10083	58	male	indian	unemployed	secondary	15		yes	41	20	34.5721	24.2136	75	1.61	28.93	no	yes	0.109	0.52	2.2	1.04	47.27	61.6	38	0.24	4.61
10059	62	male	malay	unemployed	tertiary	36	1200	yes	46	20	35.2115	24.4915	65.4	1.65	24.02	no	yes	0.156	1.797	2.58	1.99	76.83	70.4	71.6	1.68	5.88
10117	69	male	malay	unemployed	secondary	40		yes	49	20	34.0969	24.0208	78	1.64	29	no	no	0.154	0.549	2.88	2.07	71.88	84.7	82.8	1.51	3.23
10111	28	male	malay	employed	secondary	28	1000	yes	11	20	34.0969	24.0208	100.2	1.7	34.67	no	no	0.174	0.615	4.09	3.12	76.28	86.7	80	2.48	8.53
10147	31	male	malay	employed	tertiary	9		yes	17	20	34.8337	24.643	100.2	1.85	29.28	no	no	0.107	0.81	4.5	3.49	77.2	80.5	77.2	3.87	5.49
10108	39	male	malay	employed	tertiary	5	2000	yes	19	20	34.0969	24.0208	109.3	1.72	36.95	no	yes	0.119	0.651	3.62	3.01	83.15	78	81.1	3.47	6.61
10051	34	male	malay	employed	secondary	34	2000	yes	20	20	31.525	21.4636	60.6	1.65	22.26	no	yes	0.091	1.76	3.84	3.26	84.9	89.1	92.4	3.37	8.55
10109	65	male	malay	employed	secondary	3	7000	yes	41	20	34.0969	24.0208	78	1.73	26.06	no	no	0.688	1.77	1.9	0.72	37.89	47.1	23.9	0.22	2.06
10137	59	male	malay	employed	secondary	38	1000	yes	49	20	34.8337	24.643	57	1.66	20.69	no	no	0.13	0.528	3.32	2.62	78.92	86.5	90	2.62	6.82
10116	53	male	malay	employed	primary	20	1100	yes	26	16	34.0969	24.0208	58.5	1.52	25.32	yes	no	0.111	0.721	2.54	2.12	83.46	79.6	85.5	2.64	7.3
10017	18	male	malay	employed	tertiary	18	2000	yes	1	15	22.5348	19.1171	109	1.56	44.79	no	no	0.025	0.024	3.42	2.93	85.67	130	121	3.79	8.14
10065	38	male	malay	employed	secondary	30	4000	yes	23	15	35.2115	24.4915	78	1.71	26.67	no	yes	0.06	1.72	4.61	3.48	75.49	99.8	93.5	2.78	9.49
10134	49	male	malay	employed	secondary	40	3000	yes	33	15	34.8337	24.643	105	1.8	32.41	no	yes	0.136	0.579	4.69	3.69	78.68	95.3	96.3	2.43	10.93
10104	34	female	malay	employed	tertiary	27	3000	yes	22	14	34.5721	24.2136	54	1.63	20.32	no	no	0.12	0.568	3.25	2.49	76.62	91.8	84.4	2.08	5.59
10181	21	male	malay	unemployed	tertiary	21		yes	3	12	37.2201	26.9699	100.04	1.67	35.87	no	no	0.061	0.564	3.34	2.92	87.43	72.5	75.1	3.56	7.8
10163	31	female	malay	unemployed	tertiary	31		yes	16	10	37.2201	26.9699	69.5	1.58	27.84	no	no	0.172	0.466	2.55	2.11	82.75	75.4	73.8	2.32	3.8
10019	26	male	malay	employed	tertiary	10	1500	yes	8	10	22.5348	19.1171	122	1.76	39.39	no	no	0.029	0.045	3.93	2.92	74.3	77.2	69.5	2.28	7.38
10010	30	male	malay	employed	tertiary	5	2000	yes	9	10	22.4125	19.0791	72.6	1.69	25.42	yes	yes	0.059	0.032	3.39	2.96	87.32	73.4	78.1	3.76	5.56
10016	28	male	malay	employed	tertiary	20	1500	yes	10	10	22.5348	19.1171	79	1.66	28.67	no	no	0.066	0.116	3.64	3.24	89.01	81.4	87.1	4.67	7.91
10005	29	male	malay	employed	tertiary	7	3600	yes	11	10	22.4125	19.0791	97	1.74	32.04	no	no	0.081	0.03	4.08	3.01	73.77	82.6	74.1	2.31	6.46
10042	32	male	malay	employed	tertiary	31	9000	yes	16	10	31.525	21.4636	84	1.81	25.64	no	no	0.067	1.523	4.33	3.4	78.52	87.3	84.2	3.09	10.04
10060	31	male	malay	employed	secondary	31	2500	yes	19	12	35.2115	24.4915	54.2	1.63	20.4	no	no	0.09	1.615	3.43	3.17	92.42	80.7	90.3	3.85	9.49
10043	36	male	malay	employed	secondary	10	8000	yes	20	10	31.525	21.4636	131	1.78	41.35	no	no	0.116	1.51	3.77	3.24	85.94	74.1	79.2	4.08	9.44
10084	37	male	malay	employed	primary	30	1200	yes	20	10	34.5721	24.2136	60	1.62	22.86	no	yes	0.098	0.629	2.96	2.11	71.28	72.4	63.4	1.8	2.61
10061	40	male	malay	employed	tertiary	20	6000	yes	20	10	35.2115	24.4915	128.6	1.8	39.69	no	no	0.109	1.672	4.5	3.66	81.33	88.1	90.1	3.86	10.76
10082	38	male	malay	employed	tertiary	12	1200	yes	25	10	34.5721	24.2136	59	1.6	23.05	no	yes	0.2	0.96	2.79	2.77	99.28	70.1	85.5	4.38	10.83
10113	55	male	malay	employed	secondary	30	4000	yes	32	10	34.0969	24.0208	61.9	1.66	22.46	no	yes	0.418	0.564	3	2.46	82	76.5	81.7	2.87	9.16
10182	18	male	malay	unemployed	tertiary	13		yes	1	8	37.2201	26.9699	57	1.71	19.49	no	no	0.126	0.589	3.38	3.29	97.34	74.9	85.7	4.95	6.59
10148	37	male	malay	employed	secondary	15	3000	yes	22	8	34.8337	24.643	88.3	1.73	29.5	no	no	0.047	0.622	3.9	3.11	79.74	81.9	81	3.16	7.15
10039	27	male	malay	employed	tertiary	3		yes	14	7	31.525	21.4636	75	1.72	25.35	no	no	0.029	0.681	3.35	2.71	80.9	70	67.8	2.6	7.88
10112	54	male	malay	employed	secondary	32	1500	yes	24	7	34.0969	24.0208	77.3	1.64	28.74	no	no	0.055	0.58	3.6	2.71	75.28	94	91.9	2.52	3.34
10022	52	male	malay	employed	tertiary	18	8000	yes	32	7	22.5348	19.1171	78	1.72	26.37	no	yes	0.191	0.63	2.76	2	72.46	64.3	58	1.31	6.67
10095	51	male	malay	employed	secondary	33	2000	yes	37	7	34.5721	24.2136	90	1.65	33.06	no	no	0.078	0.577	2.76	2.25	81.52	69.7	73.1	2.45	7.96
10149	26	male	malay	employed	tertiary	5	3400	yes	10	6	34.8337	24.643	83.7	1.73	27.97	no	no	0.309	1.113	4.74	4.16	87.76	96.5	102.5	5.31	10.5
10145	42	male	malay	employed	secondary	20	2000	yes	12	6	34.8337	24.643	92.9	1.74	30.68	no	yes	0.248	0.916	3.18	2.71	85.22	67.7	72.7	3.99	8.6
10011	36	male	malay	employed	tertiary	36	4000	yes	16	6	22.4125	19.0791	73.2	1.63	27.55	no	yes	0.081	0.026	2.62	2.26	86.26	63	66.7	2.84	4.09
10075	64	male	malay	unemployed	primary	34	1500	yes	52	5	35.2115	24.4915	76.4	1.68	27.07	no	yes	0.101	0.239	2.93	1.9	64.85	77.7	67.6	0.99	5.26
10138	24	male	malay	employed	secondary	3	2500	yes	6	5	34.8337	24.643	45	1.65	16.53	no	no	0.138	0.664	3.25	3.05	93.85	72.9	81.6	4.27	5.67
10014	25	male	malay	employed	tertiary	5	1800	yes	9	5	22.5348	19.1171	52	1.77	16.6	yes	no	0.024	0.079	4	3.36	84	74.48	75.8	4.57	6.2
10029	25	male	malay	employed	secondary	25	2800	yes	9	5	22.6343	19.0778	57.5	1.7	19.9	no	no	0.012	0.104	4.42	3.69	83.48	93.1	92.9	3.81	7.46
10046	31	male	malay	employed	tertiary	23	4000	yes	10	5	31.525	21.4636	74	1.65	27.18	no	no	0.064	1.662	3.6	3	83.33	82.6	83.6	3.1	8.75
10114	36	male	malay	employed	secondary	20	2000	yes	22	5	34.0969	24.0208	57.6	1.72	19.47	no	yes	0.202	0.662	3.64	2.97	81.59	77.4	78.4	3.09	11.55
10115	53	male	malay	employed	secondary	30	7000	yes	33	5	34.0969	24.0208	53	1.6	20.7	yes	no	0.092	0.404	3.47	2.84	81.84	95.1	100	3.4	7.02
10025	40	male	malay	employed	secondary	39	2500	yes	20	4	22.6343	19.0778	97.5	1.66	35.38	no	no	0.105	0.058	2.76	2	72.46	64.3	58	1.31	6.67
10151	28	male	malay	employed	tertiary	7	3000	yes	11	3	34.8337	24.643	74	1.7	25.61	no	no	0.055	0.656	4.09	3.58	87.53	86.7	91.8	4.27	8.74
10164	18	male	malay	unemployed	tertiary	18		yes	6	2	37.2201	26.9699	51	1.62	19.43	no	no	0.156	0.714	2.83	2.54	89.75	70.9	73.6	3.15	4.74
10008	25	male	malay	employed	tertiary	3	7000	yes	2	2	22.4125	19.0791	93.4	1.71	31.94	no	no	0.066	0.132	4.2	3.13	74.52	87.3	78.3	2.47	7.74
10150	30	male	malay	employed	tertiary	30	3500	yes	12	2	34.8337	24.643	65.65	1.62	25.02	no	no	0.125	0.956	4.21	3.49	82.9	99.3	99.4	4.07	11.84
10094	41	female	malay	employed	secondary	41	3200	yes	23	2	34.5721	24.2136	62	1.56	25.48	no	yes	0.109	0.687	2.63	2.06	78.33	82.4	78.9	1.93	4.59
10020	61	female	malay	employed	primary	45	950	yes	31	1	22.5348	19.1171	60.5	1.49	27.25	no	no	0.141	0.312	1.85	1.38	74.59	73.4	70.8	1.11	2.37
10049	23	male	others	unemployed	tertiary	23		no			31.525	21.4636	87	1.69	30.46	no	no	0.06	2.03	4	3.23	80.75	85.1	82	3.09	10.13
10162	19	female	indian	unemployed	tertiary	19		no			37.2201	26.9699	65	1.59	25.71	no	yes	0.065	0.485	2.65	2.32	87.55	77.3	76.1	3.09	6.52
10033	20	male	indian	unemployed	secondary	20	1200	no			22.6343	19.0778	41	1.5	18.22	yes	yes	0.038	0.381	2.11	1.97	93.36	59.6	63.3	2.01	3.26
10160	22	female	indian	unemployed	tertiary	20		no			37.2201	26.9699	77	1.63	28.98	no	no	0.118	0.935	2.87	2.65	92.33	79.3	83.9	3.34	6.5
10064	38	female	indian	unemployed	secondary	7		no			35.2115	24.4915	45	1.53	19.22	no	yes	0.06	1.825	2.1	1.95	92.86	68.4	76.5	2.62	4.98
10089	38	female	indian	unemployed	secondary	30		no			34.5721	24.2136	65	1.65	23.88	yes	yes	0.12	0.546	2.55	2.22	87.06	70.6	75	2.55	6.37
10050	22	male	chinese	unemployed	tertiary	5	10000	no			31.525	21.4636	71	1.68	25.16	no	no	0.084	1.441	3.77	3.16	83.82	81.1	80.8	3.46	8.17
10052	22	male	chinese	unemployed	tertiary	5	4000	no			31.525	21.4636	66.6	1.64	24.76	no	no	0.043	1.692	4.06	3.4	83.74	92.1	91.6	3.37	11.59
10048	23	male	chinese	unemployed	tertiary	5	3500	no			31.525	21.4636	72.7	1.78	22.95	yes	no	0.057	2.177	3.79	3.48	91.82	72.2	80	4.03	7.48
10056	23	male	chinese	unemployed	tertiary	23	3000	no			31.525	21.4636	71	1.75	23.18	no	no	0.09	1.636	4.28	3.55	83.33	84	84.3	3.79	7.86
10057	23	female	chinese	unemployed	tertiary	5		no			31.525	21.4636	54	1.63	20.32	no	no	0.059	1.603	3.32	2.84	85.84	92.7	91.6	3.18	7.03
10058	23	female	chinese	unemployed	tertiary	6	5000	no			31.525	21.4636	62	1.67	22.23	no	no	0.079	1.71	3.14	2.75	87.58	83.5	84.9	3.04	7.38
10067	53	female	chinese	unemployed	secondary	44	6000	no			35.2115	24.4915	67	1.61	25.85	no	no	0.085	1.824	2.04	1.7	80.88	68.9	74.9	1.54	5.43
10183	18	male	malay	unemployed	tertiary	3		no			37.2201	26.9699	69	1.66	25.04	no	no	0.048	0.544	4	3.8	95	94.8	105	6.69	10.79
10073	18	female	malay	unemployed	tertiary	18	1800	no			35.2115	24.4915	50.4	1.56	20.71	yes	no	0.068	0.053	2.52	2.52	100	78.8	88.1	3.51	5.2
10185	18	female	malay	unemployed	tertiary	18		no			37.2201	26.9699	35	1.5	15.56	no	yes	0.026	0.491	2.05	1.98	96.59	67.4	72	2.76	5.13
10187	18	female	malay	unemployed	tertiary			no			37.2201	26.9699	63	1.51	27.63	no	no	0.033	0.468	2.8	2.07	73.93	93.6	77	1.17	4.64
10188	18	female	malay	unemployed	tertiary			no			37.2201	26.9699	41	1.56	16.85	no	no	0.052	0.495	2.01	1.93	96.02	61.8	66.3	2.34	4.05
10167	19	male	malay	unemployed	tertiary	19		no			37.2201	26.9699	87	1.74	28.74	no	no	0.187	0.706	4.02	3.13	77.86	82.9	76.3	2.67	7.09
10170	19	male	malay	unemployed	tertiary	14		no			37.2201	26.9699	70	1.75	22.86	no	no	0.094	0.618	3.69	2.91	78.86	75	70.1	2.52	9.31
10194	19	female	malay	unemployed	tertiary	19		no			37.2201	26.9699	45	1.57	18.26	no	yes	0.098	0.524	2.38	2.21	92.86	72.1	74.9	3.19	6.5
10199	19	female	malay	unemployed	tertiary	19		no			37.2201	26.9699	43	1.6	16.8	no	no	0.035	0.435	2.71	2.39	88.19	79	78.1	2.61	3.51
10184	20	female	malay	unemployed	tertiary	20		no			37.2201	26.9699	80	1.59	31.64	no	no	0.149	1.182	2.52	1.96	77.78	73.3	64.5	1.89	3.37
10193	22	female	malay	unemployed	tertiary	20		no			37.2201	26.9699	65	1.57	26.37	no	no	0.111	0.538	2.82	2.44	86.52	85.2	84.1	2.82	3.97
10197	22	female	malay	unemployed	tertiary	22		no			37.2201	26.9699	39	1.52	16.88	no	no	0.04	0.426	2.69	1.96	72.86	87.1	71.5	3.85	4.84
10198	22	female	malay	unemployed	tertiary	22		no			37.2201	26.9699	60	1.52	25.97	no	no	0.083	0.443	2.53	2.18	86.17	81.9	79.6	2.87	5.22
10054	23	female	malay	unemployed	tertiary	23	9000	no			31.525	21.4636	49	1.62	18.67	no	no	0.112	1.529	3.24	3.13	96.6	91.8	102.3	5	6.54
10055	25	female	malay	unemployed	tertiary	10		no			31.525	21.4636	50	1.64	18.59	no	no	0.18	1.637	2.76	2.43	88.04	76	77.6	2.39	4.09
10028	28	female	malay	unemployed	secondary	38		no			22.6343	19.0778	72	1.63	27.1	no	no	0.286	0.078	2.61	2.19	83.91	74.1	75.8	2.57	6.35
10081	28	female	malay	unemployed	secondary	28	2150	no			35.2115	24.4915	56	1.67	20.08	no	no	0.217	0.543	2.93	2.32	79.18	77.9	72.7	2.14	4.49
10018	32	male	malay	unemployed	tertiary	30	10000	no			22.5348	19.1171	95	1.58	38.05	no	no	0.076	0.024	2.88	2.53	87.85	72.7	77.4	3.26	5.85
10074	38	female	malay	unemployed	secondary	19	1800	no			35.2115	24.4915	74	1.53	31.61	no	no	0.092	0.23	2.65	2.31	87.17	86	89.9	3.65	7.78
10105	39	female	malay	unemployed	secondary		2500	no			34.5721	24.2136	80	1.52	34.63	yes	yes	0.156	0.726	2.56	2.18	85.16	84.2	86.9	2.65	5.29
10030	41	female	malay	unemployed	primary	20		no			22.6343	19.0778	71	1.63	26.72	yes	no	0.103	0.267	2.76	2.25	81.52	78.9	78.9	2.49	4.9
10078	43	female	malay	unemployed	tertiary	43	4000	no			35.2115	24.4915	46.2	1.44	22.28	no	yes	0.131	0.527	1.92	1.6	83.33	72.2	73.4	1.83	3.99
10101	47	female	malay	unemployed	secondary			no			34.5721	24.2136	58	1.6	22.66	no	no	0.101	0.601	2.28	1.74	76.32	69.9	66.7	1.41	5.54
10102	47	female	malay	unemployed	secondary	20	7000	no			34.5721	24.2136	108	1.48	49.31	no	no	0.673	0.647	1.5	1.23	82	54.7	55.7	1.28	5.57
10139	50	male	malay	unemployed	tertiary	25	5500	no			34.8337	24.643	72.8	1.63	27.4	no	no	0.106	0.546	1.81	1.52	83.98	46.8	50.2	2.05	5.68
10032	51	female	malay	unemployed	secondary	40	6000	no			22.6343	19.0778	58	1.44	27.97	no	yes	0.08	0.123	2.16	1.82	84.26	85.7	91	2.26	3.58
10103	51	female	malay	unemployed	secondary	21	3000	no			34.5721	24.2136	90	1.57	36.51	no	no	0.082	0.522	2.06	1.7	82.52	67.3	70	2.14	7.21
10076	53	female	malay	unemployed	primary	35	1000	no			35.2115	24.4915	75	1.55	31.22	no	no	0.209	0.98	2.08	1.64	78.85	71	71	1.44	4.45
10066	54	female	malay	unemployed	secondary	20	1050	no			35.2115	24.4915	61	1.57	24.75	no	yes	0.135	1.654	1.64	1.35	82.32	59.6	64	1.53	4.34
10126	57	female	malay	unemployed	secondary	20		no			34.8337	24.643	56.3	1.52	24.37	no	yes	0.066	0.59	2.06	1.68	81.55	74.6	78.1	1.83	2.72
10040	58	male	malay	unemployed	secondary	20		no			31.525	21.4636	83.5	1.74	27.58	no	no	0.188	1.112	2.05	1.66	80.98	58.4	59.3	1.58	5.86
10131	58	female	malay	unemployed	tertiary	38		no			34.8337	24.643	62.35	1.51	27.35	no	yes	0.136	0.582	2.29	1.95	85.15	86.4	94.7	2.49	3.19
10068	59	female	malay	unemployed	primary	34		no			35.2115	24.4915	77	1.62	29.34	no	no	0.125	1.679	2.26	1.78	78.76	72.2	73.3	1.66	5.54
10119	59	female	malay	unemployed	secondary	43	4000	no			34.8337	24.643	65.7	1.59	25.99	no	no	0.04	0.833	2.66	2.16	80	88	92.7	2.35	7.73
10122	59	female	malay	unemployed	secondary	59		no			34.8337	24.643	75.9	1.58	30.4	no	no	0.044	0.491	1.54	1.3	84.42	52.6	57.3	1.54	3.81
10125	60	female	malay	unemployed	secondary	30		no			34.8337	24.643	67.5	1.51	29.6	no	yes	0.145	0.577	1.88	1.52	80.85	72.3	75.6	1.77	3.47
10132	60	female	malay	unemployed	secondary	30	2000	no			34.8337	24.643	85.2	1.58	34.13	no	yes	0.324	0.602	1.9	1.53	80.53	65.5	68	1.67	2.89
10107	61	male	malay	unemployed	tertiary	10	6000	no			34.0969	24.0208	75	1.68	26.57	no	no	0.054	0.736	3.05	2.16	70.82	78.4	73.5	1.29	8.42
10120	61	female	malay	unemployed	tertiary	40	5000	no			34.8337	24.643	60.85	1.32	34.92	no	no	0.095	0.447	2.14	1.81	84.58	117.6	129.3	2.97	4.63
10044	62	male	malay	unemployed	secondary	62		no			31.525	21.4636	62.7	1.67	22.48	no	no	0.074	1.482	3.07	1.85	60.26	81.4	65.1	0.95	4.82
10123	63	male	malay	unemployed	tertiary	30		no			34.8337	24.643	65.3	1.65	23.99	no	yes	0.034	0.595	2.98	2.57	86.24	82.3	94.5	3.94	6.05
10124	63	male	malay	unemployed	tertiary	40	6000	no			34.8337	24.643	88	1.7	30.45	no	yes	0.049	0.605	2.6	2.27	87.31	65.8	76.4	3.87	5.33
10129	63	female	malay	unemployed	tertiary	34		no			34.8337	24.643	56.75	1.47	26.26	no	no	0.114	0.545	1.92	1.62	84.38	81.4	90	1.95	2.5
10091	67	male	malay	unemployed	secondary	50		no			34.5721	24.2136	76	1.61	29.32	no	no	0.118	0.598	2.9	2.06	71.03	89	85.5	1.72	5.95
10069	68	female	malay	unemployed	secondary	41		no			35.2115	24.4915	60.1	1.44	28.98	no	yes	0.203	0.567	1.63	1.55	95.09	78	98.7	2.69	3.02
10071	74	male	malay	unemployed	secondary	50	1300	no			35.2115	24.4915	61	1.61	23.53	no	yes	0.085	0.987	2.4	1.53	63.75	78.4	69.5	0.73	6.22
10063	19	female	indian	employed	secondary	19	1200	no			35.2115	24.4915	54	1.63	20.32	no	yes	0.141	1.941	2.06	1.99	96.6	57.9	63	2.59	2.94
10088	33	female	indian	employed	tertiary	10	1000	no			34.5721	24.2136	55	1.56	22.6	no	yes	0.308	0.587	2.48	2.09	84.27	76.3	76.3	1.94	2.68
10001	36	female	indian	employed	tertiary	5	20000	no			22.4125	19.0791	55	1.71	18.81	yes	no	0.071	0.524	2.6	2.12	81.54	66.5	65.8	2.1	5.22
10070	36	female	indian	employed	secondary	30	3800	no			35.2115	24.4915	83.8	1.61	32.33	no	no	0.049	0.006	2.65	2.07	77.74	76.8	71.8	1.77	4.25
10087	41	female	indian	employed	primary	10	2000	no			34.5721	24.2136	65	1.52	28.13	no	yes	0.095	0.525	2.32	1.68	72.41	77.3	68.3	1.66	1.89
10031	48	female	indian	employed	secondary	48	2500	no			22.6343	19.0778	64	1.65	23.51	no	yes	0.084	0.195	2.05	1.66	80.98	58.4	59.3	1.58	5.86
10038	52	female	indian	employed	tertiary	50	3000	no			22.6343	19.0778	57	1.66	20.69	no	no	0.156	0.059	2.3	1.93	83.91	66.7	71	2.7	5.5
10092	60	female	indian	employed	primary	25	200	no			34.5721	24.2136	69	1.47	31.93	no	yes	0.429	0.643	1.49	1.23	82.55	56.9	60.6	1.7	4.54
10093	65	female	indian	employed	secondary	25	200	no			34.5721	24.2136	67	1.53	28.62	no	yes	0.724	0.736	1.86	1.32	72.04	68.6	64.7	0.96	3.39
10096	31	female	chinese	employed	secondary	10	600	no			34.5721	24.2136	44	1.64	16.36	no	no	0.125	0.552	2.51	2.21	88.04	69.5	68.1	0.88	6.06
10098	37	female	chinese	employed	tertiary	37	12000	no			34.5721	24.2136	65	1.53	27.77	no	no	0.108	0.508	2.8	2.11	75.63	87.7	79.9	1.7	4.3
10021	45	female	chinese	employed	tertiary	26	1500	no			22.5348	19.1171	90	1.61	34.72	no	no	0.081	0.078	2.69	1.93	71.75	80.1	71.2	1.27	5.68
10045	55	male	malay	employed	secondary	10		no			31.525	21.4636	83	1.68	29.41	no	yes	0.064	1.678	2.11	1.82	86.26	55.5	63.9	2.22	7.94
10195	20	female	malay	employed	tertiary	20	750	no			37.2201	26.9699	42	1.46	19.7	no	no	0.055	0.394	2.28	2.06	90.35	80.3	79.5	2.71	4.28
10174	21	female	malay	employed	tertiary	21	1600	no			37.2201	26.9699	78	1.56	32.05	no	no	0.113	0.681	2.3	2.02	87.83	69.9	72.9	2.52	4.81
10141	24	male	malay	employed	tertiary	23	2000	no			34.8337	24.643	77	1.73	25.73	no	no	0.126	0.589	5.08	4.42	87.01	102.8	107.3	4.9	6.74
10097	27	male	malay	employed	tertiary	20		no			34.5721	24.2136	102	1.68	36.14	no	no	0.073	0.586	3.12	2.56	82.05	67.7	66.7	2.54	7.67
10143	27	male	malay	employed	tertiary	9	2000	no			34.8337	24.643	70.9	1.79	22.13	no	no	0.075	0.676	5.19	4.59	88.44	98.7	106.5	5.42	7.76
10157	27	female	malay	employed	tertiary	27	1300	no			37.2201	26.9699	43	1.54	18.13	no	no	0.182	0.723	2.41	2.29	95.02	75.8	83.6	2.61	3.09
10152	28	male	malay	employed	tertiary	8	2000	no			34.8337	24.643	90.1	1.68	31.92	no	no	0.118	0.652	3.52	2.94	83.52	76.7	77.6	3.12	8.77
10035	28	female	malay	employed	tertiary	28	2000	no			22.6343	19.0778	58	1.5	25.78	no	no	0.026	0.004	2.41	1.93	80.08	80.1	73.9	1.87	4.42
10041	28	male	malay	employed	tertiary	6	6000	no			31.525	21.4636	75	1.75	24.49	no	no	0.101	3.045	3.24	3.22	99.38	64.8	78.3	4.26	10.48
10110	28	male	malay	employed	tertiary	28	2300	no			34.0969	24.0208	67	1.72	22.65	no	no	0.058	0.571	4.16	4.03	96.88	86.3	101.5	5.63	8.78
10118	28	female	malay	employed	tertiary	28	2000	no			34.0969	24.0208	41.3	1.53	17.64	no	no	0.042	0.459	2.36	2.02	85.59	75.2	74.3	2.49	3.43
10153	28	male	malay	employed	tertiary	4		no			34.8337	24.643	75.2	1.66	27.29	no	yes	0.171	0.765	3.95	3.48	88.1	88.4	93.5	4.6	6.17
10176	28	female	malay	employed	tertiary	6	1700	no			37.2201	26.9699	90	1.61	34.72	no	no	0.084	0.672	3.09	2.6	84.14	88.5	87.5	3.08	4.1
10013	29	male	malay	employed	tertiary	20	10000	no			22.5348	19.1171	79	1.73	26.4	no	no	0.07	0.031	3.57	2.98	83.47	73.2	74.3	3.29	10.53
10047	29	male	malay	employed	secondary	8	2000	no			31.525	21.4636	81.5	1.63	30.67	no	no	0.082	1.504	3.13	2.78	88.82	72.8	77.9	4.03	8.2
10173	29	female	malay	employed	tertiary	29	1800	no			37.2201	26.9699	77	1.56	31.64	no	no	0.065	0.574	2.54	2.18	85.83	77.9	78.4	2.4	2.72
10180	29	female	malay	employed	tertiary	29	1800	no			37.2201	26.9699	89	1.59	35.2	no	no	0.078	0.563	2.15	1.88	87.44	63.4	64.8	2.61	3.22
10080	30	male	malay	employed	secondary	25	1650	no			35.2115	24.4915	88	1.66	31.93	no	no	0.069	0.494	2.98	2.57	86.24	67.1	70.2	3.27	10.33
10100	30	male	malay	employed	tertiary	9	2000	no			34.5721	24.2136	96	1.79	29.96	no	yes	0.079	0.607	4.23	3.74	88.42	80.9	87.8	5.44	9.59
10003	31	male	malay	employed	tertiary	5	3900	no			22.4125	19.0791	96	1.77	30.64	no	no	0.086	0.065	4.53	3.77	83.22	89	90.8	3.98	12.03
10178	31	female	malay	employed	secondary		1100	no			37.2201	26.9699	48	1.56	19.72	no	no	0.057	0.639	2.25	1.72	76.44	69.2	62.5	1.41	5.22
10002	32	female	malay	employed	tertiary	10	4500	no			22.4125	19.0791	72	1.6	28.12	no	yes	0.064	0.31	2.13	2.02	94.84	62.3	70.1	2.84	3.82
10007	32	male	malay	employed	tertiary	32	5000	no			22.4125	19.0791	77.5	1.67	27.79	no	no	0.03	0.538	4.64	3.77	81.25	103.8	103	3.77	9.3
10079	32	female	malay	employed	secondary	32	1600	no			35.2115	24.4915	47	1.46	22.05	no	yes	0.095	0.474	1.98	1.98	100	70	81.5	4.03	4.64
10121	32	male	malay	employed	tertiary	32	5000	no			34.8337	24.643	86.05	1.7	29.78	no	no	0.118	0.532	3.98	3.46	86.93	85.6	91.1	5.84	9.25
10172	32	female	malay	employed	secondary	32	1200	no			37.2201	26.9699	64	1.46	30.02	no	no	0.166	0.609	2.27	2.01	88.55	80.2	82.7	2.77	5.51
10190	32	female	malay	employed	tertiary	9	3000	no			37.2201	26.9699	48	1.56	19.72	no	no	0.044	0.472	2.69	2.57	95.54	82.8	93.8	3.98	5.9
10161	33	male	malay	employed	tertiary	33	2000	no			37.2201	26.9699	63.5	1.69	22.23	no	no	0.109	0.474	3.66	3.13	85.52	79.7	83.5	3.7	7.73
10006	33	male	malay	employed	tertiary	4	2500	no			22.4125	19.0791	54.4	1.61	20.99	no	no	0.063	0.081	3.34	2.65	79.34	81.1	78.2	2.58	3.82
10026	33	female	malay	employed	secondary	33	4000	no			22.6343	19.0778	51	1.5	22.67	yes	yes	0.264	0.322	2.74	2.32	84.67	91.6	91	2.71	6.53
10062	33	male	malay	employed	secondary	10	5000	no			35.2115	24.4915	97.2	1.71	33.24	no	no	0.099	1.549	3.6	3.09	85.83	76.8	80.9	3.5	8.91
10159	33	female	malay	employed	tertiary	10	3300	no			37.2201	26.9699	75	1.59	29.67	no	no	0.049	0.404	3.16	2.77	87.66	93.5	97.2	3.92	6.53
10171	33	female	malay	employed	tertiary	10	1650	no			37.2201	26.9699	58	1.57	23.53	no	no	0.175	0.685	2.3	2.02	87.83	69.9	72.9	2.52	4.81
10015	34	male	malay	employed	tertiary	6	9000	no			22.5348	19.1171	72	1.63	27.1	no	no	0.033	0.045	3.82	3.81	84.03	90.5	92.8	4.21	8.13
10136	34	male	malay	employed	tertiary	9	9300	no			34.8337	24.643	115	1.86	33.24	no	yes	0.116	0.57	5.6	4.63	82.68	99.8	102.9	4.75	12.86
10085	35	female	malay	employed	secondary	10	600	no			34.5721	24.2136	49	1.53	20.93	no	no	0.215	0.54	2.21	1.61	72.85	71.3	62.2	1.17	4.44
10086	35	female	malay	employed	secondary	30	2000	no			34.5721	24.2136	130	1.62	49.54	no	yes	0.631	0.752	3.2	2.8	87.5	91.2	96.2	3.74	7.81
10128	35	male	malay	employed	tertiary	5	4500	no			34.8337	24.643	93	1.69	32.56	no	yes	0.104	0.659	3.74	3.17	84.76	82.6	86.1	3.61	4.04
10169	35	female	malay	employed	tertiary	35	3000	no			37.2201	26.9699	78	1.57	31.64	no	no	0.11	0.64	2.71	2.47	91.14	82.9	90.5	3.67	4.52
10177	35	female	malay	employed	tertiary	10	3000	no			37.2201	26.9699	43	1.59	17.01	no	yes	0.097	1.071	2.47	1.95	78.95	73.3	69.6	1.74	5.82
10012	36	male	malay	employed	tertiary	18	1200	no			22.5348	19.1171	57	1.6	22.27	no	no	0.158	0.037	3.39	2.76	81.42	86	85.7	3.04	3.74
10144	36	male	malay	employed	tertiary	13	3400	no			34.8337	24.643	81.3	1.67	29.15	no	no	0.083	0.718	4.17	3.44	82.49	95.2	97.2	3.48	10.67
10155	36	male	malay	employed	primary			no			34.8337	24.643	66.9	1.65	24.57	no	no	0.099	0.66	4.21	3.49	82.9	99.3	99.4	4.07	11.84
10179	36	female	malay	employed	secondary	30	2000	no			37.2201	26.9699	79	1.64	29.37	no	no	0.217	0.614	3	2.4	80	83.8	81.4	2.71	5.53
10189	36	female	malay	employed	tertiary	36	3000	no			37.2201	26.9699	48	1.6	18.75	no	yes	0.041	0.588	2.76	2.21	80.07	81.2	78.1	2.19	3.8
10009	37	male	malay	employed	tertiary	14	8000	no			22.4125	19.0791	83	1.72	28.06	no	no	0.043	0.021	3.82	3.15	82.46	81.3	83.1	3.5	6.07
10037	37	female	malay	employed	tertiary	37	2000	no			22.6343	19.0778	49	1.56	20.13	no	no	0.062	0.041	2.27	2.03	89.43	70.5	75.7	2.29	4.94
10106	37	male	malay	employed	tertiary	29	7000	no			34.0969	24.0208	72.7	1.64	27.03	no	yes	0.13	0.643	3.57	2.68	75.07	84.8	78.6	2.04	8.97
10168	37	female	malay	employed	tertiary	37	2700	no			37.2201	26.9699	67	1.54	28.25	yes	yes	0.113	0.883	2.78	2.22	79.86	88.8	85.7	2.14	6.1
10146	38	male	malay	employed	tertiary	30	4000	no			34.8337	24.643	65.8	1.66	23.88	no	no	0.077	1.578	3.71	3.12	84.1	85.9	89.1	4.56	7.85
10156	38	female	malay	employed	tertiary	38	4000	no			37.2201	26.9699	62	1.68	21.97	no	no	0.166	0.663	2.98	2.44	81.88	79.5	79.2	2.91	6.67
10165	38	female	malay	employed	tertiary	20	3000	no			37.2201	26.9699	78	1.58	31.24	no	no	0.092	0.608	3.19	2.53	79.31	97	93	2.31	6.86
10004	39	female	malay	employed	secondary	15	7000	no			22.4125	19.0791	60	1.56	24.65	no	no	0.031	0.009	2.65	2.06	77.74	82.6	78	1.89	4.36
10186	39	female	malay	employed	tertiary	20	3500	no			37.2201	26.9699	73	1.52	31.6	yes	no	0.105	0.471	2.12	1.95	91.98	70	78.3	4.27	7.15
10191	39	female	malay	employed	tertiary	20	4600	no			37.2201	26.9699	47	1.47	21.75	no	no	0.019	0.469	2.18	1.78	81.65	76.2	75.1	1.91	3.54
10175	40	female	malay	employed	tertiary	16	3000	no			37.2201	26.9699	67	1.56	27.53	no	no	0.11	0.611	2.83	2.42	85.51	88.4	92	3.22	5.79
10166	41	female	malay	employed	tertiary	15	3800	no			37.2201	26.9699	56	1.49	25.22	no	no	0.111	1.081	2.54	2.11	83.07	88.2	89.4	2.89	5.64
10027	44	male	malay	employed	tertiary	40	10000	no			22.6343	19.0778	88	1.5	39.11	no	no	0.021	0.411	2.46	2.08	84.55	74.1	77.6	2.63	8.11
10053	45	male	malay	employed	primary	20	1150	no			31.525	21.4636	110.6	1.7	38.27	no	yes	0.091	1.702	3.41	2.96	86.8	77.5	85.3	4.15	6.98
10158	46	female	malay	employed	tertiary	20	3000	no			37.2201	26.9699	66	1.59	26.11	no	no	0.027	0.414	2.65	2.18	82.26	82	84.2	2.18	8.46
10192	48	female	malay	employed	tertiary	20	5900	no			37.2201	26.9699	70	1.59	27.69	yes	no	0.078	0.52	2.74	2.16	78.83	85.4	84.4	2.13	7.33
10127	49	male	malay	employed	secondary	25		no			34.8337	24.643	72	1.73	24.06	no	yes	0.071	0.877	3.81	3.09	81	84.2	88.3	2.96	10.68
10154	50	male	malay	employed	tertiary	26	4500	no			34.8337	24.643	62	1.6	24.22	no	yes	0.064	0.676	3.09	2.51	81.23	83.1	86	2.55	8.85
10130	52	male	malay	employed	secondary	10	1300	no			34.8337	24.643	63.66	1.64	23.67	no	yes	0.162	0.707	3.29	2.75	83.59	84.8	91.4	3.07	8.75
10142	53	male	malay	employed	tertiary	53		no			34.8337	24.643	85.1	1.7	29.45	no	no	0.226	0.526	2.87	2.43	84.67	67.8	74.1	2.76	9.61
10023	53	male	malay	employed	tertiary	3	5000	no			22.6343	19.0778	90	1.68	31.89	no	no	0.14	0.139	2.75	2.36	85.82	67.2	74.7	2.51	9.1
10072	53	female	malay	employed	secondary	35	5000	no			35.2115	24.4915	60	1.52	25.97	no	no	0.101	0.162	1.53	1.33	86.93	55.4	61.9	2.21	4.34
10034	54	male	malay	employed	secondary	55	3000	no			22.6343	19.0778	94	1.77	30	no	no	0.063	0.048	3.6	2.72	75.56	78.1	76.8	2.05	10.92
10036	54	male	malay	employed	secondary	30	1700	no			22.6343	19.0778	72	1.64	26.77	no	no	0.078	0.194	2.67	2.62	98.13	69.7	88.8	5.18	8.17
10099	55	female	malay	employed	tertiary	30	2000	no			34.5721	24.2136	72	1.53	30.76	no	no	0.117	0.813	2.49	2.09	83.94	77.6	83.9	2.02	6.64
10077	58	male	malay	employed	secondary	50	1000	no			35.2115	24.4915	73.8	1.66	26.78	no	no	0.138	0.584	2.93	2.24	76.45	73.6	73.7	1.9	6.36
10135	59	male	malay	employed	secondary	20	1200	no			34.8337	24.643	54	1.63	20.32	no	yes	0.151	0.592	3.16	2.43	76.9	87.1	88.4	2.05	8.57
10133	62	male	malay	employed	tertiary	30	8000	no			34.8337	24.643	76.7	1.73	25.63	no	no	0.137	0.546	3.54	2.8	79.1	85.3	89.2	2.6	9.93
10024	63	male	malay	employed	secondary	63	4000	no			22.6343	19.0778	113	1.73	37.76	no	no	0.084	0.175	3.37	2.57	76.26	82.2	83.7	2.03	10.7
10090	63	female	malay	employed	primary	42	270	no			34.5721	24.2136	61	1.46	28.62	no	no	0.143	0.556	1.31	1.2	91.6	56.7	67.4	2.33	4.13
10140	66	female	malay	employed	tertiary	30		no			34.8337	24.643	57	1.6	22.27	no	no	0.289	0.686	1.26	1	79.37	52.5	54.9	0.76	4.79
